# Supplementary material
Source: PubMed Central journal article supplement (PMC1550315)
Supplement: bj3980279add.pdf [file bj3980279add.pdf]

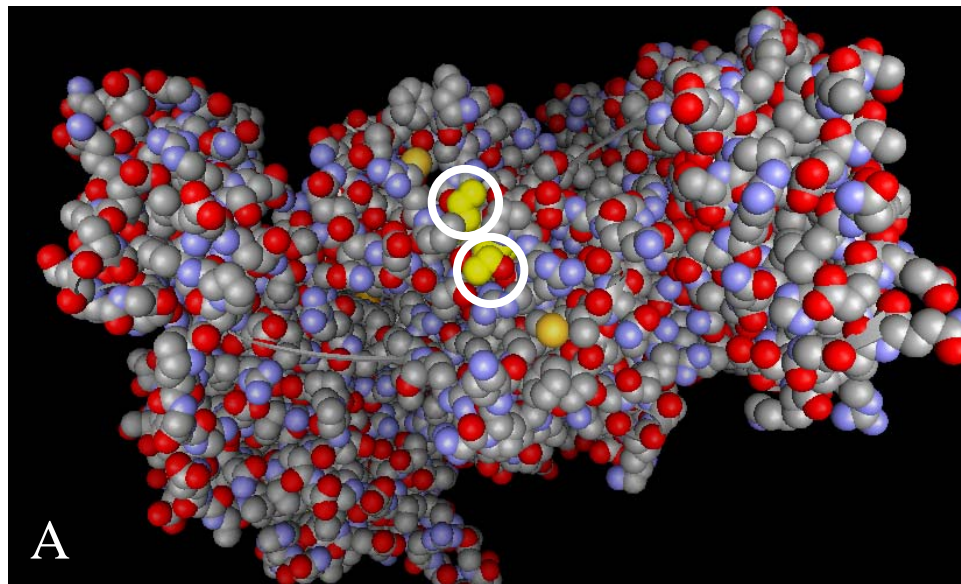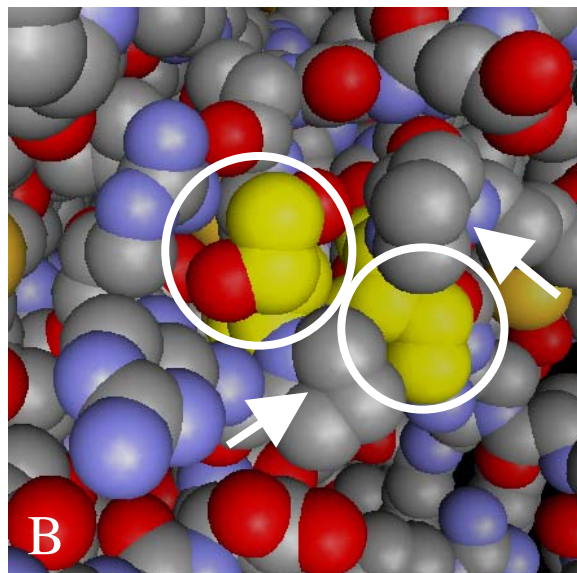

**Supplemental Figure. Space-filling models of eNOS oxygenase domain homodimer.** Models of dimeric eNOS were generated with 3D Molecule Viewer (Vector, NTI, Stratagene) using the crystal structure generated by Fischmann, et al and discussed in text. The T97 residues are marked as yellow with the side chain oxygen atoms in red (white circles A and B). The immediate C-terminal prolines are indicated with white arrows (B). Views are of the eNOS dimer (A) or region of interest (B).
